# Supplementary material
Source: Springer Nature journal article supplement (https://www.springermedizin.de/resource/supplementary/12891_2013_1958_MOESM1_ESM.pdf/9508880)
Supplement: MOESM1 [file 9508880]

**719 patients were eligible**

**311 patients declined to participate**

**408 patients were included**

**25 patients did not deliver all questionnaires**

**10 patients submitted incomplete questionnaires**

**373 patients with data registration**
